# Supplementary material for: RNA-Based Assay for Next-Generation Sequencing of Clinically Relevant Gene Fusions in Non-Small Cell Lung Cancer
Source: MDPI journal article supplement (doi:10.3390/cancers13010139), 2021-01-04
Supplement: s1 [file s1]

## Run Summary

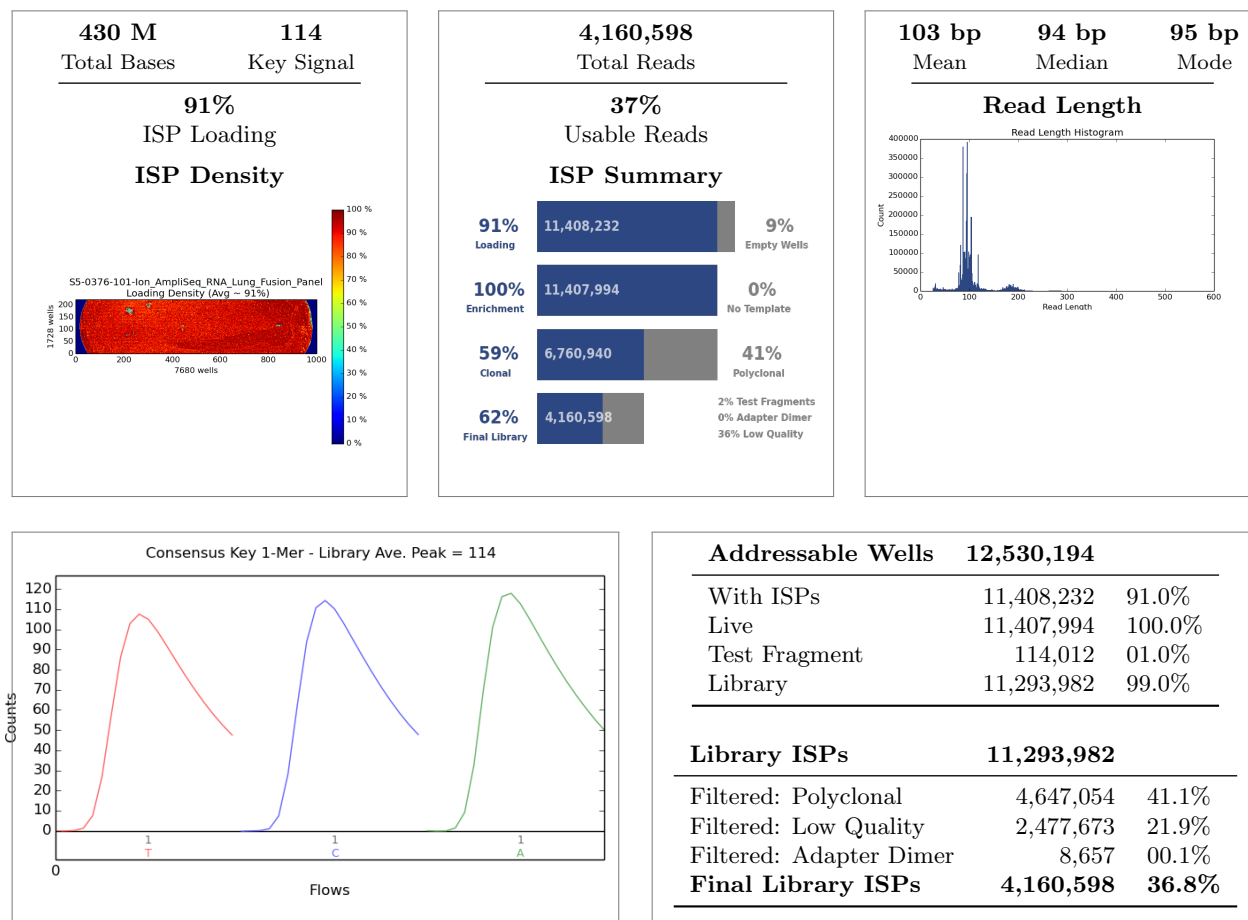

| Barcode Name | Sample         | Bases      | $\geq Q20$ | Reads   | Mean Read Length | Read Length Histogram |
|--------------|----------------|------------|------------|---------|------------------|-----------------------|
| No barcode   | none           | 23,286,386 | 18,786,252 | 217,568 | 107 bp           |                       |
| IonCode_0117 | Fusion18B3385  | 32,494,711 | 29,106,231 | 303,128 | 107 bp           |                       |
| IonCode_0118 | Fusion18I895   | 17,704,604 | 16,210,780 | 185,939 | 95 bp            |                       |
| IonCode_0119 | Fusion18B2494  | 14,676,687 | 13,507,031 | 159,090 | 92 bp            |                       |
| IonCode_0120 | Fusion18I2993  | 15,485,930 | 14,069,004 | 156,947 | 98 bp            |                       |
| IonCode_0121 | Fusion19B122   | 32,790,809 | 29,655,099 | 302,515 | 108 bp           |                       |
| IonCode_0122 | Fusion_19_B_2  | 21,345,329 | 19,593,380 | 214,921 | 99 bp            |                       |
| IonCode_0123 | Fusion_20_F508 | 25,827,780 | 23,585,994 | 217,258 | 118 bp           |                       |

# Run Report for Auto\_user\_S5-0376-101-Ion\_AmpliSeq\_RNA\_Lung\_Fusion\_Panel\_341

|              |                |            |            |         |        |                                                                                     |
|--------------|----------------|------------|------------|---------|--------|-------------------------------------------------------------------------------------|
| IonCode_0124 | Fusion_19_57   | 29,610,448 | 27,100,888 | 262,757 | 112 bp |  |
| IonCode_0125 | Fusion_18_352  | 58,490,079 | 52,884,802 | 500,331 | 116 bp |  |
| IonCode_0126 | Fusion_17_8717 | 43,291,691 | 39,337,018 | 406,457 | 106 bp |  |
| IonCode_0127 | Fusion_15_3258 | 25,927,547 | 23,880,014 | 274,466 | 94 bp  |  |
| IonCode_0128 | Fusion_19_571  | 37,756,521 | 34,615,439 | 398,107 | 94 bp  |  |
| IonCode_0129 | Fusion_18_127  | 19,999,745 | 18,234,791 | 201,903 | 99 bp  |  |
| IonCode_0130 | Fusion_4210    | 11,318,222 | 10,272,246 | 131,172 | 86 bp  |  |
| IonCode_0131 | Fusion_17_7995 | 9,314,877  | 8,579,374  | 111,430 | 83 bp  |  |
| IonCode_0132 | Fusion_14736   | 10,891,724 | 9,941,941  | 116,583 | 93 bp  |  |

| Test Fragment | Reads         | Percent 50AQ17 | Read Length Histogram                                                                |
|---------------|---------------|----------------|--------------------------------------------------------------------------------------|
| <b>TF_1</b>   | <b>29,667</b> | <b>94</b>      | 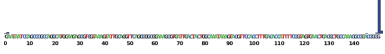 |

## Alignment Summary (*aligned to SiRe\_fusion*)

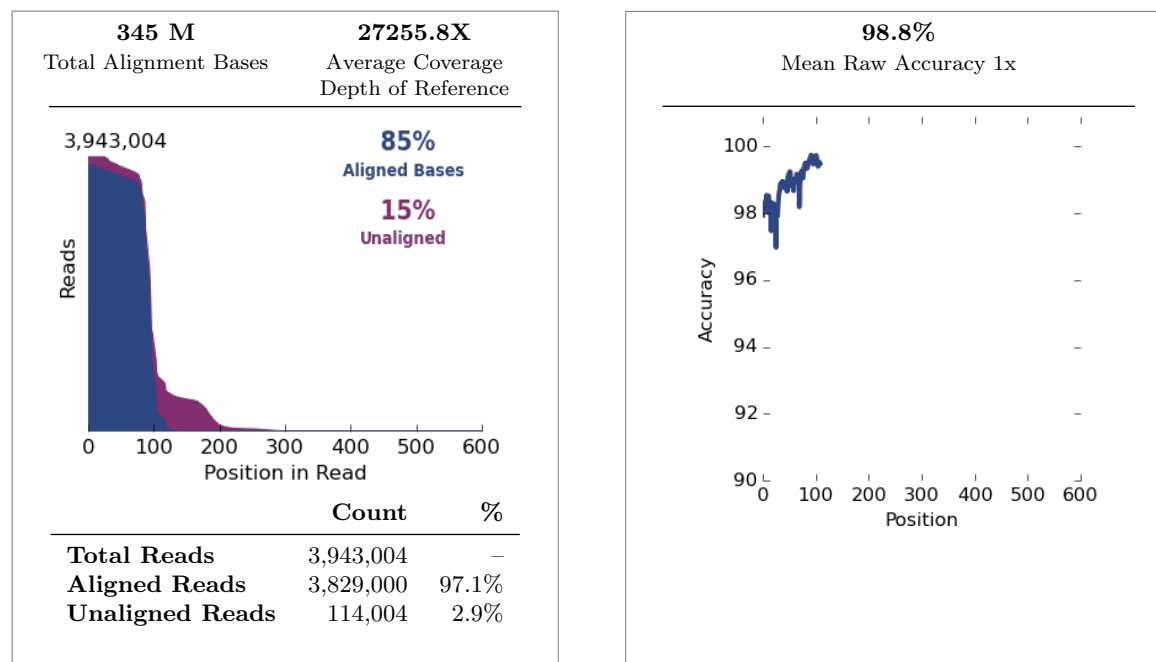

| Alignment Quality           |         |         |         |
|-----------------------------|---------|---------|---------|
|                             | AQ17    | AQ20    | Perfect |
| Total Number of Bases [Mbp] | 301 M   | 260 M   | 251 M   |
| Mean Length [bp]            | 87      | 80      | 78      |
| Longest Alignment [bp]      | 154     | 154     | 153     |
| Mean Coverage Depth         | 23834.5 | 20551.2 | 19842.9 |

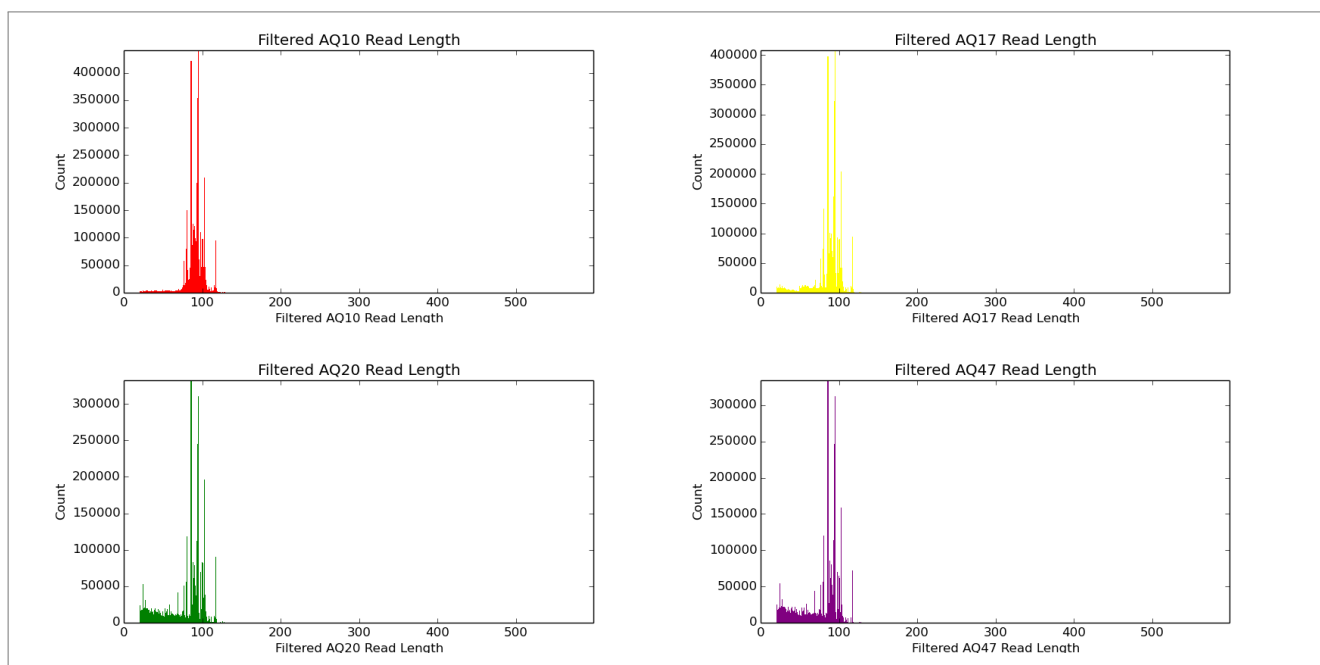

## coverageAnalysis

Library type: AmpliSeq RNA

Target regions: WG00250\_ExtendedLungFusion\_Designed

| Barcode Name                 | Sample               | Mapped Reads | On Target |
|------------------------------|----------------------|--------------|-----------|
| <a href="#">IonCode_0117</a> | Fusion_18_B_3385     | 299,664      | 99.62%    |
| <a href="#">IonCode_0118</a> | Fusion_18_I_895      | 180,976      | 99.25%    |
| <a href="#">IonCode_0119</a> | Fusion_18_B_2494     | 154,359      | 97.95%    |
| <a href="#">IonCode_0120</a> | Fusion_18_I_2993     | 153,463      | 99.12%    |
| <a href="#">IonCode_0121</a> | Fusion_19_B_122      | 298,962      | 99.68%    |
| <a href="#">IonCode_0122</a> | Fusion_19_B_2        | 210,894      | 99.09%    |
| <a href="#">IonCode_0123</a> | Fusion_20_F_508      | 215,587      | 99.82%    |
| <a href="#">IonCode_0124</a> | Fusion_Pietoso       | 260,914      | 99.77%    |
| <a href="#">IonCode_0125</a> | Fusion_Caporaso      | 491,093      | 99.58%    |
| <a href="#">IonCode_0126</a> | Fusion_Ponticelli    | 391,648      | 99.12%    |
| <a href="#">IonCode_0127</a> | Fusion_Frallicciardi | 270,813      | 98.69%    |
| <a href="#">IonCode_0128</a> | Fusion_Abbate        | 393,114      | 99.20%    |
| <a href="#">IonCode_0129</a> | Fusion_Canto         | 199,035      | 99.07%    |
| <a href="#">IonCode_0130</a> | Fusion_4210          | 111,104      | 93.02%    |
| <a href="#">IonCode_0131</a> | Fusion_17_7995       | 96,590       | 91.45%    |
| <a href="#">IonCode_0132</a> | Fusion_14736         | 100,784      | 95.17%    |

1

5

items per page

1 - 16 of 16 items

## Analysis Details

|                            |                                                                                                                                                                                                                                                                          |
|----------------------------|--------------------------------------------------------------------------------------------------------------------------------------------------------------------------------------------------------------------------------------------------------------------------|
| <b>Run Name</b>            | R_2020_06_16_09_02_48_user_S5-0376-101-Ion_AmpliSeq_RNA_Lung_Fusion_Panel                                                                                                                                                                                                |
| <b>Run Date</b>            | June 16, 2020, 9:04 a.m.                                                                                                                                                                                                                                                 |
| <b>Run Flows</b>           | 850                                                                                                                                                                                                                                                                      |
| <b>Projects</b>            |                                                                                                                                                                                                                                                                          |
| <b>Sample</b>              | Fusion_Abbate, Fusion_14736, Fusion_18_B_3385, Fusion_Canto, Fusion_Ponticelli, Fusion_4210, Fusion_19_B_122, Fusion_Pietoso, Fusion_18_I_2993, Fusion_Frallicciardi, Fusion_Caporaso, Fusion_18_I_895, Fusion_18_B_2494, Fusion_19_B_2, Fusion_20_F_508, Fusion_17_7995 |
| <b>Reference</b>           |                                                                                                                                                                                                                                                                          |
| <b>Instrument</b>          | S5-0376                                                                                                                                                                                                                                                                  |
| <b>Operation Mode</b>      | Customer mode                                                                                                                                                                                                                                                            |
| <b>Flow Order</b>          | TACGTACGTCTGAGCATCGATCGATGTACAGC                                                                                                                                                                                                                                         |
| <b>Library Key</b>         | TCAG                                                                                                                                                                                                                                                                     |
| <b>TF Key</b>              | ATCG                                                                                                                                                                                                                                                                     |
| <b>Chip Barcode</b>        | DAGA02297                                                                                                                                                                                                                                                                |
| <b>Chip Check</b>          | Passed                                                                                                                                                                                                                                                                   |
| <b>Chip Type</b>           | 520                                                                                                                                                                                                                                                                      |
| <b>Chip Data</b>           | tiled                                                                                                                                                                                                                                                                    |
| <b>Chip Lot Number</b>     | Q0RC69                                                                                                                                                                                                                                                                   |
| <b>Chip Wafer</b>          | 23                                                                                                                                                                                                                                                                       |
| <b>Barcode Set</b>         | IonCode Barcodes 1-32                                                                                                                                                                                                                                                    |
| <b>Analysis Name</b>       | Auto_user_S5-0376-101-Ion_AmpliSeq_RNA_Lung_Fusion_Panel_341                                                                                                                                                                                                             |
| <b>Analysis Date</b>       | June 16, 2020, 4:02 p.m.                                                                                                                                                                                                                                                 |
| <b>Analysis Flows</b>      | 0                                                                                                                                                                                                                                                                        |
| <b>runID</b>               | CF5Q0                                                                                                                                                                                                                                                                    |
| <b>BeadFind Args</b>       | justBeadFind -args-json /opt/ion/config/args_520_beadfind.json                                                                                                                                                                                                           |
| <b>Analysis Args</b>       | Analysis -args-json /opt/ion/config/args_520_analysis.json                                                                                                                                                                                                               |
| <b>Pre-BaseCaller</b>      | BaseCaller -trim-qual-cutoff 15 -barcode-filter-minreads 10<br>-phasing-residual-filter=2.0 -wells-normalization on                                                                                                                                                      |
| <b>Calibration Args</b>    | Calibration -num-calibration-regions 1,1                                                                                                                                                                                                                                 |
| <b>BaseCaller Args</b>     | BaseCaller -trim-qual-cutoff 15 -barcode-filter-minreads 10<br>-phasing-residual-filter=2.0 -num-unfiltered 1000 -barcode-filter-postpone 1<br>-qual-filter true -qual-filter-slope 0.040 -qual-filter-offset 1.0<br>-wells-normalization on                             |
| <b>Alignment Args</b>      | tmap mapall ... stage1 map4                                                                                                                                                                                                                                              |
| <b>IonStats Args</b>       | ionstats alignment                                                                                                                                                                                                                                                       |
| <b>Analysis Parameters</b> | default                                                                                                                                                                                                                                                                  |

## Chef Summary

### Chef Template Prep Information:

|                                  |                           |
|----------------------------------|---------------------------|
| Chef Last Updated                | June 16, 2020, 8:43 a.m.  |
| Chef Instrument Name             | CHEF00839                 |
| Chef Operation Mode              | Customer Mode             |
| Sample Position                  | 1                         |
| Tip Rack Barcode                 | 48B1400D8                 |
| Chip Type 1                      | 520v1                     |
| Chip Type 2                      | S500                      |
| Chip Expiration 1                | None                      |
| Chip Expiration 2                | None                      |
| Templating Kit Type              | Ion 510                   |
| amp; Ion 520                     | amp; Ion 530 Kit-Chef     |
| Chef Flexible Workflow           |                           |
| Reagent Expiration               | 200331                    |
| Reagent Lot Number               | 2070211                   |
| Reagent Part Number              | A34018C                   |
| Reagent Cartridge Serial Number  | None                      |
| Solution Lot Number              | 2065570                   |
| Solution Part Number             | A27754C                   |
| Templating Protocol Planned      | (use instrument default)  |
| Solution Cartridge Serial Number | None                      |
| Solution Expiration              | 200331                    |
| Templating Protocol Executed     | (use instrument default)  |
| Chef Script Version              | 905                       |
| Chef Package Version             | IC.5.12.0                 |
| Start Time                       | June 15, 2020, 12:19 p.m. |
| Completion Time                  | June 16, 2020, 8:43 a.m.  |

## S5 Consumables Summary

|              |           |
|--------------|-----------|
| Chip Type    | 520v1     |
| Chip Barcode | DAGA02297 |

| Product Description       | Part Number | Lot Number | Exp. Date  | Remaining Uses |
|---------------------------|-------------|------------|------------|----------------|
| Ion S5 Cleaning Solution  | 100031096   | 2049959    | 2019/12/31 | 5              |
| Ion S5 Sequencing Reagent | INS1012841B | 2049947    | 2020/01/31 | 1              |
| Ion S5 Wash Solution      | 100031091B  | 2058327    | 2020/02/29 | 1              |

## Software Version

|                      |           |
|----------------------|-----------|
| <b>Torrent_Suite</b> | 5.12.0    |
| <b>host</b>          | tsvm      |
| <b>ion-analysis</b>  | 5.12.11-1 |
| <b>ion-dbreports</b> | 5.12.35-1 |
| <b>ion-gpu</b>       | 5.12.0-1  |
| <b>ion-pipeline</b>  | 5.12.11-1 |
| <b>ion-torrentpy</b> | 5.12.8-1  |
| <b>ion-torrentr</b>  | 5.12.10-1 |
| <b>S5 Script</b>     | 0.1.31    |
| <b>LiveView</b>      | 2514      |
| <b>DataCollect</b>   | 3738      |
| <b>OIA</b>           | 51206     |
| <b>OS</b>            | 35        |
| <b>Graphics</b>      | 134       |
| <b>Ion_Chef</b>      | IC.5.12.0 |



# Run Report for reanalisi

## Run Summary

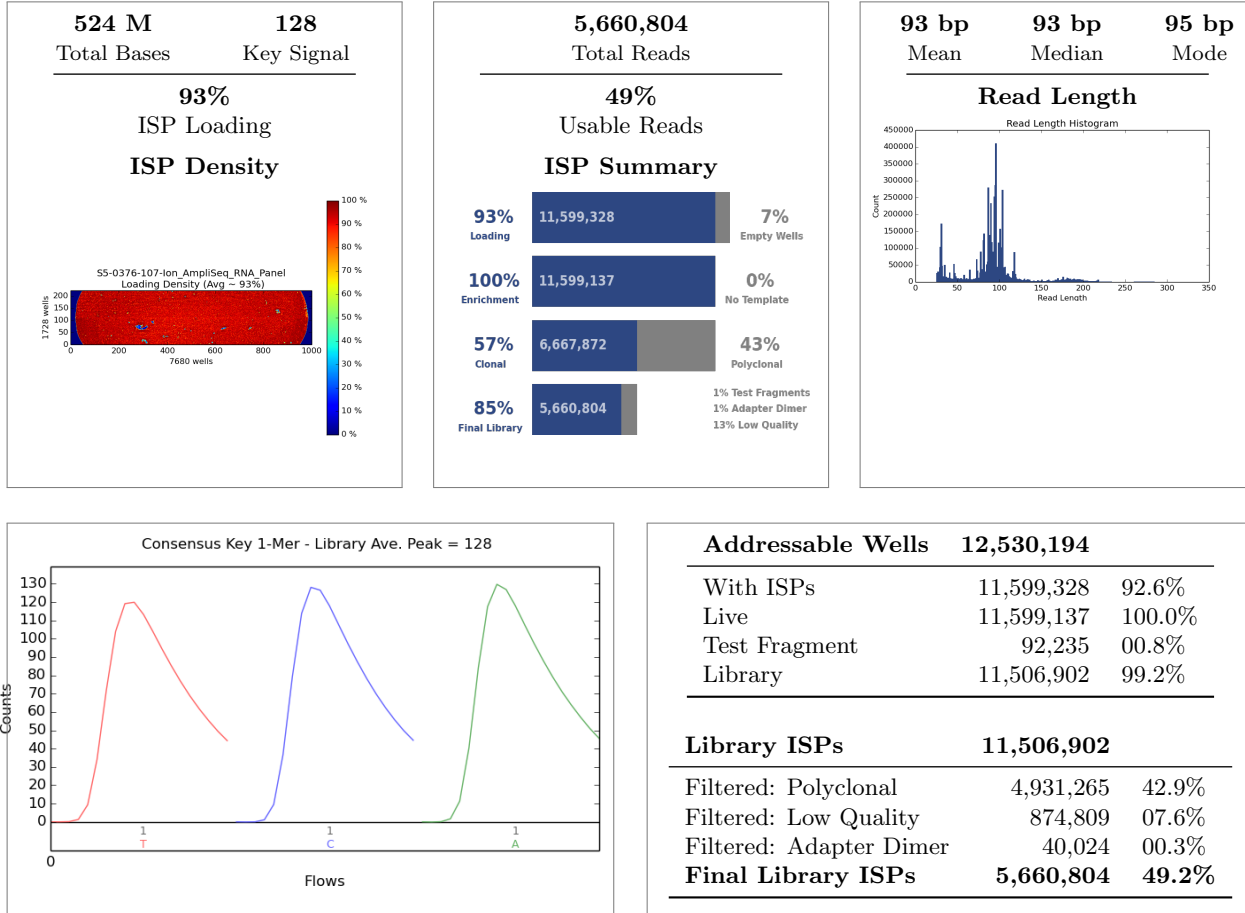

| Barcode Name | Sample        | Bases      | $\geq Q20$ | Reads   | Mean Read Length | Read Length Histogram |
|--------------|---------------|------------|------------|---------|------------------|-----------------------|
| No barcode   | none          | 25,135,011 | 22,608,959 | 239,194 | 105 bp           |                       |
| IonCode_0117 | FUSION16C5752 | 32,167,326 | 30,068,815 | 361,649 | 88 bp            |                       |
| IonCode_0118 | FUSION13C5007 | 25,337,140 | 23,870,898 | 329,494 | 76 bp            |                       |
| IonCode_0119 | FUSION11C8597 | 9,064,261  | 8,526,987  | 187,641 | 48 bp            |                       |
| IonCode_0120 | FUSION11S5960 | 50,568,773 | 47,526,040 | 485,126 | 104 bp           |                       |
| IonCode_0121 | FUSION18C482  | 34,894,704 | 32,707,467 | 372,192 | 93 bp            |                       |
| IonCode_0122 | FUSION11C9307 | 31,313,401 | 29,344,945 | 326,568 | 95 bp            |                       |
| IonCode_0123 | FUSION20C374  | 50,057,995 | 46,099,437 | 390,759 | 128 bp           |                       |

## Run Report for reanalisi

|              |                |            |            |         |        |                                                                                     |
|--------------|----------------|------------|------------|---------|--------|-------------------------------------------------------------------------------------|
| IonCode_0124 | FUSION15C4638  | 12,865,682 | 12,202,244 | 170,404 | 75 bp  |  |
| IonCode_0125 | FUSION13C2416  | 16,765,306 | 15,684,592 | 256,212 | 65 bp  |  |
| IonCode_0126 | FUSION14I2731  | 26,720,082 | 25,030,441 | 341,244 | 78 bp  |  |
| IonCode_0127 | FUSION10C2977  | 48,192,941 | 44,937,245 | 461,455 | 104 bp |  |
| IonCode_0128 | FUSION20C1459  | 66,593,968 | 61,805,458 | 644,418 | 103 bp |  |
| IonCode_0129 | FUSION15C416B  | 28,511,208 | 26,412,449 | 308,298 | 92 bp  |  |
| IonCode_0130 | FUSION17I5356  | 26,496,025 | 24,848,973 | 306,868 | 86 bp  |  |
| IonCode_0131 | FUSION18I2137  | 32,723,835 | 30,706,310 | 351,711 | 93 bp  |  |
| IonCode_0132 | FUSION14C4583C | 7,049,194  | 6,705,216  | 127,519 | 55 bp  |  |

| Test Fragment | Reads         | Percent 50AQ17 | Read Length Histogram                                                                |
|---------------|---------------|----------------|--------------------------------------------------------------------------------------|
| <b>TF_1</b>   | <b>29,191</b> | <b>96</b>      | 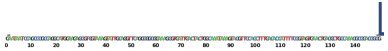 |

## Alignment Summary (*aligned to hg19 AmpliSeq Transcriptome v1.1*)

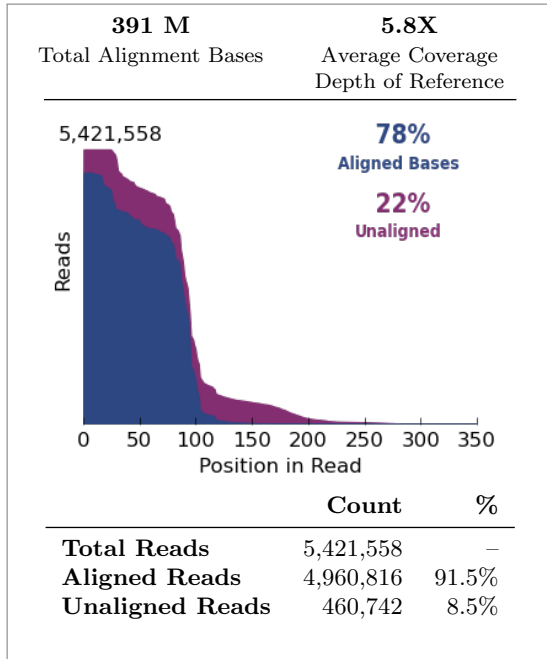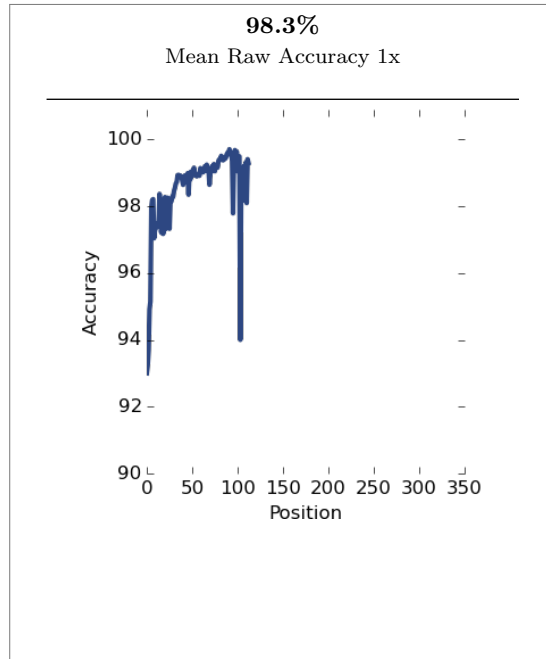

| Alignment Quality           |       |       |         |
|-----------------------------|-------|-------|---------|
|                             | AQ17  | AQ20  | Perfect |
| Total Number of Bases [Mbp] | 327 M | 283 M | 272 M   |
| Mean Length [bp]            | 84    | 77    | 75      |
| Longest Alignment [bp]      | 297   | 297   | 283     |
| Mean Coverage Depth         | 4.9   | 4.2   | 4.0     |

## Run Report for reanalisi

---

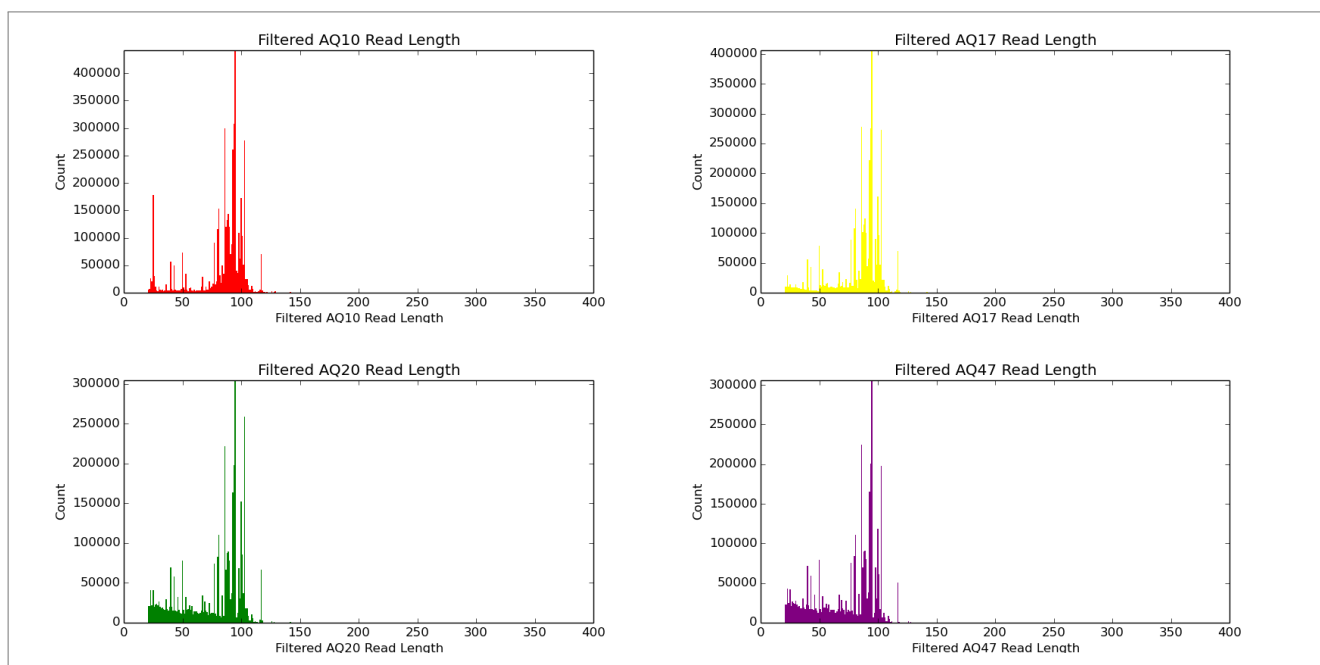

## coverageAnalysis

All barcodes had invalid target regions specified.

## Analysis Details

|                            |                                                                                                                                                                                                                                                                                                            |
|----------------------------|------------------------------------------------------------------------------------------------------------------------------------------------------------------------------------------------------------------------------------------------------------------------------------------------------------|
| <b>Run Name</b>            | R_2020.07.02_13.08.04_user_S5-0376-107-Ion-AmpliSeq-RNA-Panel                                                                                                                                                                                                                                              |
| <b>Run Date</b>            | July 2, 2020, 1:09 p.m.                                                                                                                                                                                                                                                                                    |
| <b>Run Flows</b>           | 500                                                                                                                                                                                                                                                                                                        |
| <b>Projects</b>            |                                                                                                                                                                                                                                                                                                            |
| <b>Sample</b>              | FUSION_13_C.5007A, FUSION_15_C.4638, FUSION_20_C.374B, FUSION_10_C.2977, FUSION_14_I.2731A3, FUSION_20_C.1459D, FUSION_16_C.5752A, FUSION_18_I.2137A1, FUSION_13_C.2416C, FUSION_14_C.4583C, FUSION_15_C.416B, FUSION_11_C.8597, FUSION_11_S.5960, FUSION_11_C.9307B, FUSION_18_C.482B, FUSION_17_I.5356A2 |
| <b>Reference</b>           |                                                                                                                                                                                                                                                                                                            |
| <b>Instrument</b>          | S5-0376                                                                                                                                                                                                                                                                                                    |
| <b>Operation Mode</b>      | Customer mode                                                                                                                                                                                                                                                                                              |
| <b>Flow Order</b>          | TACGTACGTCTGAGCATCGATCGATGTACAGC                                                                                                                                                                                                                                                                           |
| <b>Library Key</b>         | TCAG                                                                                                                                                                                                                                                                                                       |
| <b>TF Key</b>              | ATCG                                                                                                                                                                                                                                                                                                       |
| <b>Chip Barcode</b>        | DAGB02050                                                                                                                                                                                                                                                                                                  |
| <b>Chip Check</b>          | Passed                                                                                                                                                                                                                                                                                                     |
| <b>Chip Type</b>           | 520                                                                                                                                                                                                                                                                                                        |
| <b>Chip Data</b>           | tiled                                                                                                                                                                                                                                                                                                      |
| <b>Chip Lot Number</b>     | Q0SS79                                                                                                                                                                                                                                                                                                     |
| <b>Chip Wafer</b>          | 18                                                                                                                                                                                                                                                                                                         |
| <b>Barcode Set</b>         | IonCode Barcodes 1-32                                                                                                                                                                                                                                                                                      |
| <b>Analysis Name</b>       | reanalisi                                                                                                                                                                                                                                                                                                  |
| <b>Analysis Date</b>       | Dec. 22, 2020, 7:20 p.m.                                                                                                                                                                                                                                                                                   |
| <b>Analysis Flows</b>      | 0                                                                                                                                                                                                                                                                                                          |
| <b>runID</b>               | NDRE0                                                                                                                                                                                                                                                                                                      |
| <b>BeadFind Args</b>       | justBeadFind -args-json /opt/ion/config/args_520_beadfind.json                                                                                                                                                                                                                                             |
| <b>Analysis Args</b>       | Analysis -args-json /opt/ion/config/args_520_analysis.json                                                                                                                                                                                                                                                 |
| <b>Pre-BaseCaller</b>      | BaseCaller -trim-qual-cutoff 15 -barcode-filter-minreads 10 -phasing-residual-filter=2.0 -wells-normalization on                                                                                                                                                                                           |
| <b>Calibration Args</b>    | Calibration -num-calibration-regions 1,1                                                                                                                                                                                                                                                                   |
| <b>BaseCaller Args</b>     | BaseCaller -trim-qual-cutoff 15 -barcode-filter-minreads 10 -phasing-residual-filter=2.0 -num-unfiltered 1000 -barcode-filter-postpone 1 -qual-filter true -qual-filter-slope 0.040 -qual-filter-offset 1.0 -wells-normalization on                                                                        |
| <b>Alignment Args</b>      | tmap mapall ... stage1 map4                                                                                                                                                                                                                                                                                |
| <b>IonStats Args</b>       | ionstats alignment                                                                                                                                                                                                                                                                                         |
| <b>Analysis Parameters</b> | default                                                                                                                                                                                                                                                                                                    |

## Chef Summary

### Chef Template Prep Information:

|                                         |                         |
|-----------------------------------------|-------------------------|
| <b>Chef Last Updated</b>                | July 2, 2020, 8:35 a.m. |
| <b>Chef Instrument Name</b>             | CHEF00839               |
| <b>Chef Operation Mode</b>              | Customer Mode           |
| <b>Sample Position</b>                  | 2                       |
| <b>Tip Rack Barcode</b>                 | 48B1400DF               |
| <b>Chip Type 1</b>                      | 520v1                   |
| <b>Chip Type 2</b>                      | 520v1                   |
| <b>Chip Expiration 1</b>                | None                    |
| <b>Chip Expiration 2</b>                | None                    |
| <b>Templating Kit Type</b>              | Ion 510                 |
| amp; Ion 520                            | amp; Ion 530 Kit-Chef   |
| <b>Chef Flexible Workflow</b>           |                         |
| <b>Reagent Expiration</b>               | 200331                  |
| <b>Reagent Lot Number</b>               | 2070211                 |
| <b>Reagent Part Number</b>              | A34018C                 |
| <b>Reagent Cartridge Serial Number</b>  | None                    |
| <b>Solution Lot Number</b>              | 2065570                 |
| <b>Solution Part Number</b>             | A27754C                 |
| <b>Templating Protocol Planned</b>      | Chef Protocol - 200 bp  |
| <b>Solution Cartridge Serial Number</b> | None                    |
| <b>Solution Expiration</b>              | 200331                  |
| <b>Templating Protocol Executed</b>     | Chef Protocol - 200 bp  |
| <b>Chef Script Version</b>              | 905                     |
| <b>Chef Package Version</b>             | IC.5.12.0               |
| <b>Start Time</b>                       | July 1, 2020, 3:04 p.m. |
| <b>Completion Time</b>                  | July 2, 2020, 8:35 a.m. |

## S5 Consumables Summary

|                     |           |
|---------------------|-----------|
| <b>Chip Type</b>    | 520v1     |
| <b>Chip Barcode</b> | DAGB02050 |

| Product Description       | Part Number | Lot Number | Exp. Date  | Remaining Uses |
|---------------------------|-------------|------------|------------|----------------|
| Ion S5 Cleaning Solution  | 100031096   | 2049959    | 2019/12/31 | 2              |
| Ion S5 Sequencing Reagent | INS1012841B | 2049947    | 2020/01/31 | 1              |
| Ion S5 Wash Solution      | 100031091B  | 2044840    | 2019/12/31 | 1              |

## Software Version

|                      |           |
|----------------------|-----------|
| <b>Torrent_Suite</b> | 5.12.0    |
| <b>host</b>          | tsvm      |
| <b>ion-analysis</b>  | 5.12.11-1 |
| <b>ion-dbreports</b> | 5.12.35-1 |
| <b>ion-gpu</b>       | 5.12.0-1  |
| <b>ion-pipeline</b>  | 5.12.11-1 |
| <b>ion-torrentpy</b> | 5.12.8-1  |
| <b>ion-torrentr</b>  | 5.12.10-1 |
| <b>S5 Script</b>     | 0.1.31    |
| <b>LiveView</b>      | 2514      |
| <b>DataCollect</b>   | 3738      |
| <b>OIA</b>           | 51206     |
| <b>OS</b>            | 35        |
| <b>Graphics</b>      | 134       |
| <b>Ion_Chef</b>      | IC.5.12.0 |



## Run Summary

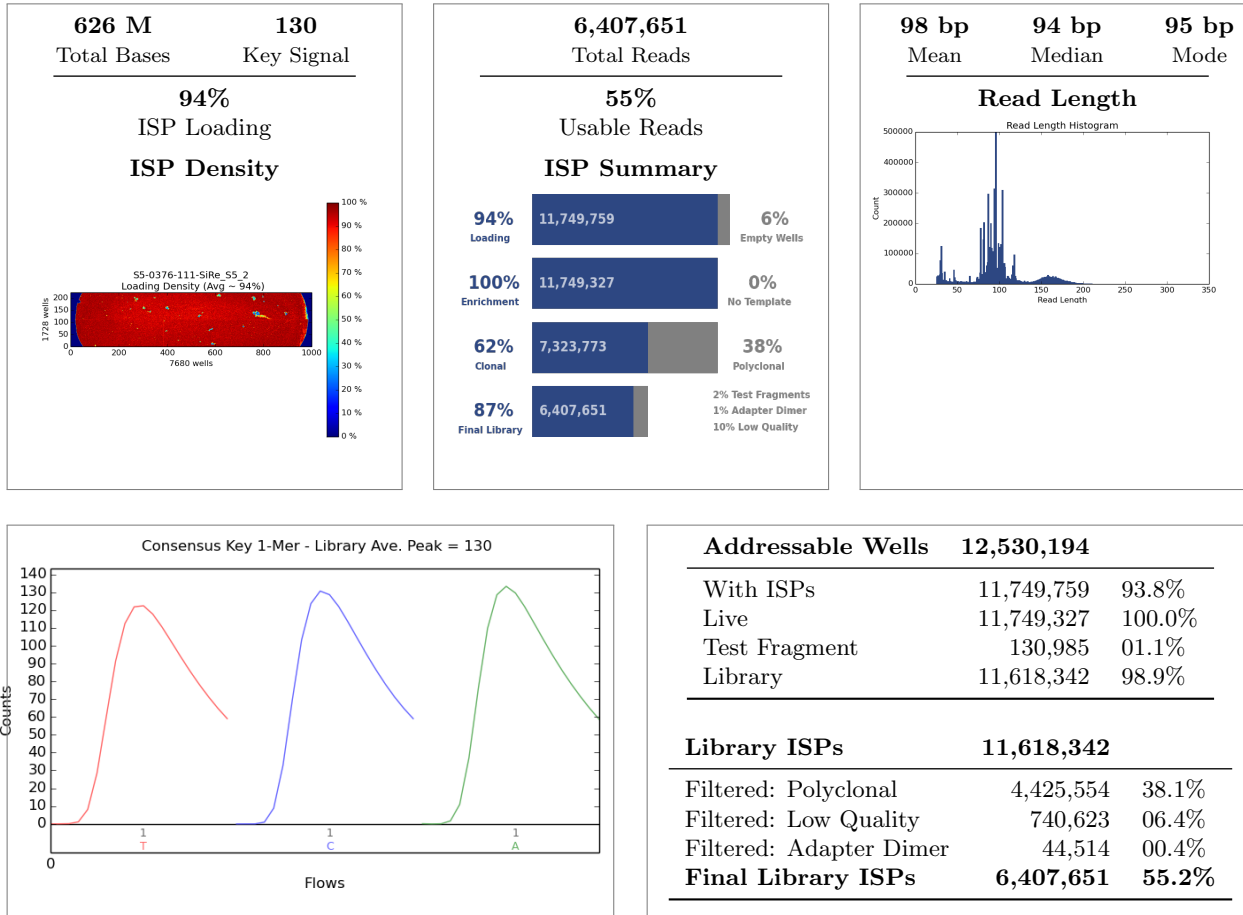

| Barcode Name | Sample        | Bases       | $\geq Q20$  | Reads     | Mean Read Length | Read Length Histogram |
|--------------|---------------|-------------|-------------|-----------|------------------|-----------------------|
| No barcode   | none          | 28,557,791  | 25,817,138  | 252,793   | 112 bp           |                       |
| IonCode_0117 | FUSION16C1355 | 46,701,436  | 42,959,196  | 516,927   | 90 bp            |                       |
| IonCode_0118 | FUSION17C3735 | 25,371,461  | 23,622,657  | 307,416   | 82 bp            |                       |
| IonCode_0119 | FUSION19C5303 | 122,118,381 | 111,309,073 | 1,099,371 | 111 bp           |                       |
| IonCode_0120 | FUSION15C3437 | 14,111,335  | 13,142,458  | 227,636   | 61 bp            |                       |
| IonCode_0121 | FUSION11I6906 | 12,274,906  | 11,484,596  | 192,366   | 63 bp            |                       |
| IonCode_0122 | FUSION20I2504 | 63,355,433  | 56,456,056  | 538,211   | 117 bp           |                       |
| IonCode_0123 | FUSION15C5484 | 38,299,723  | 36,259,745  | 413,877   | 92 bp            |                       |

# Run Report for reanalisi\_trascri

|              |                 |            |            |         |        |                                                                                     |
|--------------|-----------------|------------|------------|---------|--------|-------------------------------------------------------------------------------------|
| IonCode_0124 | FUSION10I13314  | 20,047,001 | 18,895,169 | 249,408 | 80 bp  |  |
| IonCode_0125 | FUSION19I10801  | 48,487,591 | 44,064,260 | 436,924 | 110 bp |  |
| IonCode_0126 | FUSION20I219    | 39,822,230 | 36,994,926 | 418,621 | 95 bp  |  |
| IonCode_0127 | FUSION20C803B   | 48,802,023 | 44,918,992 | 502,476 | 97 bp  |  |
| IonCode_0128 | FUSION18I9130   | 19,018,879 | 18,030,470 | 221,075 | 86 bp  |  |
| IonCode_0129 | FUSION18I304    | 14,313,847 | 13,236,148 | 181,476 | 78 bp  |  |
| IonCode_0130 | FUSION19I5879B3 | 35,860,331 | 33,544,606 | 364,420 | 98 bp  |  |
| IonCode_0131 | FUSION19I11140  | 44,831,921 | 40,532,297 | 403,814 | 111 bp |  |
| IonCode_0132 | FUSION15I4995   | 3,782,520  | 3,558,085  | 80,789  | 46 bp  |  |

| Test Fragment | Reads         | Percent 50AQ17 | Read Length Histogram                                                                |
|---------------|---------------|----------------|--------------------------------------------------------------------------------------|
| <b>TF_1</b>   | <b>60,187</b> | <b>94</b>      |  |

## Alignment Summary (*aligned to hg19 AmpliSeq Transcriptome v1.1*)

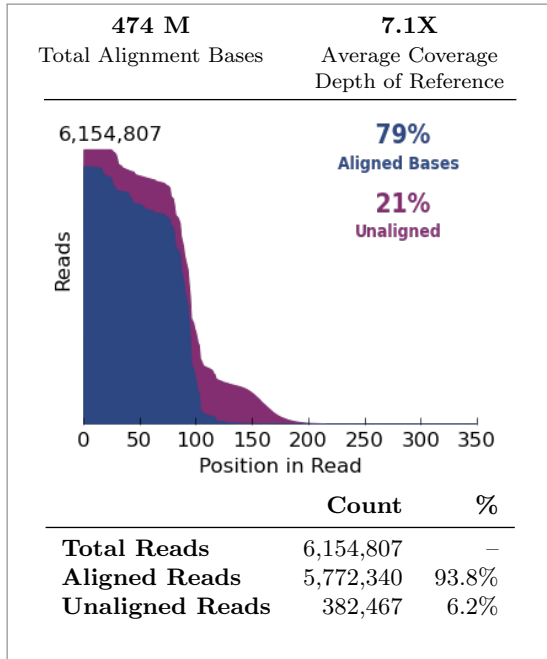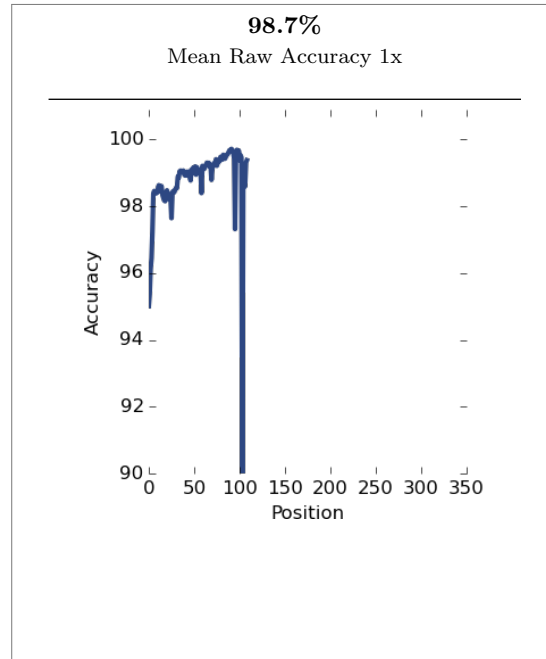

| Alignment Quality           |       |       |         |
|-----------------------------|-------|-------|---------|
|                             | AQ17  | AQ20  | Perfect |
| Total Number of Bases [Mbp] | 413 M | 364 M | 353 M   |
| Mean Length [bp]            | 84    | 78    | 76      |
| Longest Alignment [bp]      | 221   | 209   | 203     |
| Mean Coverage Depth         | 6.2   | 5.4   | 5.2     |

## Run Report for reanalisi\_trascr

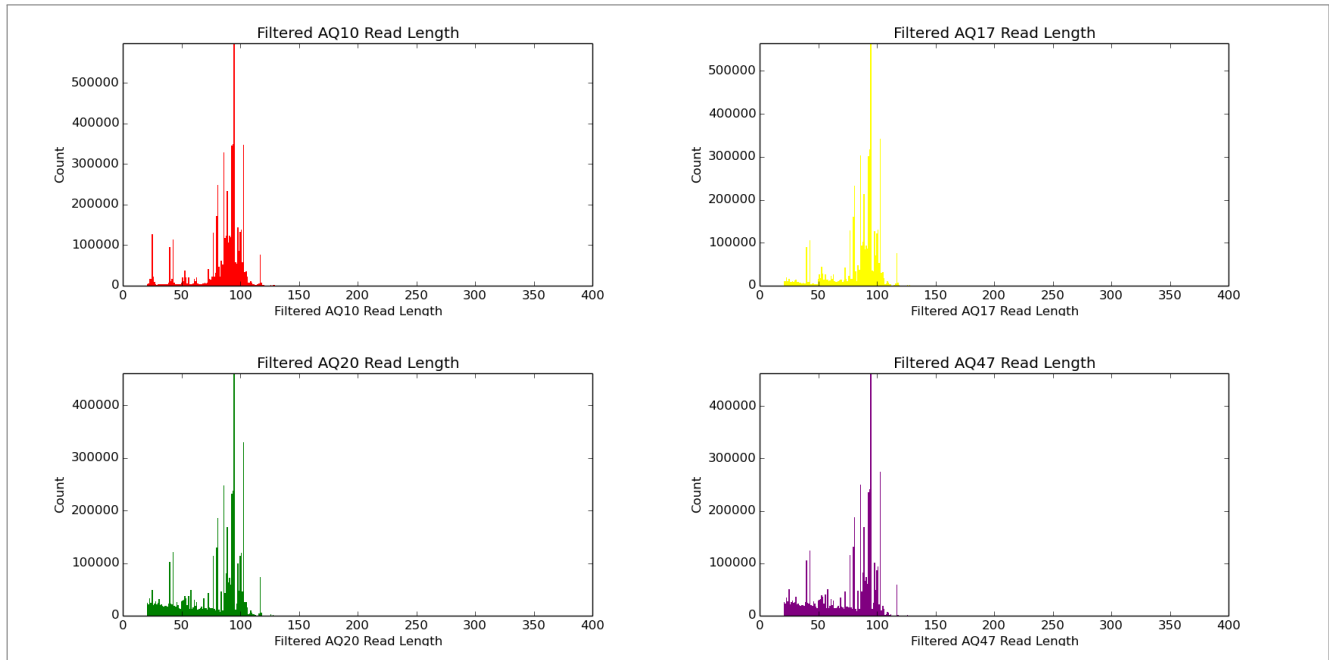

## coverageAnalysis

All barcodes had invalid target regions specified.

## Analysis Details

|                            |                                                                                                                                                                                                                                                                                                                           |
|----------------------------|---------------------------------------------------------------------------------------------------------------------------------------------------------------------------------------------------------------------------------------------------------------------------------------------------------------------------|
| <b>Run Name</b>            | R_2020.07.14.12.38.52_user_S5-0376-111-SiRe_S5_2                                                                                                                                                                                                                                                                          |
| <b>Run Date</b>            | July 14, 2020, 12:40 p.m.                                                                                                                                                                                                                                                                                                 |
| <b>Run Flows</b>           | 500                                                                                                                                                                                                                                                                                                                       |
| <b>Projects</b>            |                                                                                                                                                                                                                                                                                                                           |
| <b>Sample</b>              | FUSION_16_C_1355B, FUSION_15_I_4995, FUSION_19_C_5303_B, FUSION_18_I_9130_A1, FUSION_20_I_219_A2, FUSION_18_I_304B1, FUSION_19_I_11140B3, FUSION_11_I_6906_B, FUSION_15_C_3437_A, FUSION_19_I_10801A1, FUSION_19_I_5879B3, FUSION_10_I_13314C3, FUSION_15_C_5484B, FUSION_20_C_803B, FUSION_17_C_3735, FUSION_20_I_2504A1 |
| <b>Reference</b>           |                                                                                                                                                                                                                                                                                                                           |
| <b>Instrument</b>          | S5-0376                                                                                                                                                                                                                                                                                                                   |
| <b>Operation Mode</b>      | Customer mode                                                                                                                                                                                                                                                                                                             |
| <b>Flow Order</b>          | TACGTACGTCTGAGCATCGATCGATGTACAGC                                                                                                                                                                                                                                                                                          |
| <b>Library Key</b>         | TCAG                                                                                                                                                                                                                                                                                                                      |
| <b>TF Key</b>              | ATCG                                                                                                                                                                                                                                                                                                                      |
| <b>Chip Barcode</b>        | DAGB02071                                                                                                                                                                                                                                                                                                                 |
| <b>Chip Check</b>          | Passed                                                                                                                                                                                                                                                                                                                    |
| <b>Chip Type</b>           | 520                                                                                                                                                                                                                                                                                                                       |
| <b>Chip Data</b>           | tiled                                                                                                                                                                                                                                                                                                                     |
| <b>Chip Lot Number</b>     | Q0SS79                                                                                                                                                                                                                                                                                                                    |
| <b>Chip Wafer</b>          | 18                                                                                                                                                                                                                                                                                                                        |
| <b>Barcode Set</b>         | IonCode Barcodes 1-32                                                                                                                                                                                                                                                                                                     |
| <b>Analysis Name</b>       | reanalisi_trascri                                                                                                                                                                                                                                                                                                         |
| <b>Analysis Date</b>       | July 15, 2020, 10:02 a.m.                                                                                                                                                                                                                                                                                                 |
| <b>Analysis Flows</b>      | 0                                                                                                                                                                                                                                                                                                                         |
| <b>runID</b>               | B4869                                                                                                                                                                                                                                                                                                                     |
| <b>BeadFind Args</b>       | justBeadFind -args-json /opt/ion/config/args_520_beadfind.json                                                                                                                                                                                                                                                            |
| <b>Analysis Args</b>       | Analysis -args-json /opt/ion/config/args_520_analysis.json                                                                                                                                                                                                                                                                |
| <b>Pre-BaseCaller</b>      | BaseCaller -trim-qual-cutoff 15 -barcode-filter-minreads 10 -phasing-residual-filter=2.0 -wells-normalization on                                                                                                                                                                                                          |
| <b>Calibration Args</b>    | Calibration -num-calibration-regions 1,1                                                                                                                                                                                                                                                                                  |
| <b>BaseCaller Args</b>     | BaseCaller -trim-qual-cutoff 15 -barcode-filter-minreads 10 -phasing-residual-filter=2.0 -num-unfiltered 1000 -barcode-filter-postpone 1 -qual-filter true -qual-filter-slope 0.040 -qual-filter-offset 1.0 -wells-normalization on                                                                                       |
| <b>Alignment Args</b>      | tmap mapall ... stage1 map4                                                                                                                                                                                                                                                                                               |
| <b>IonStats Args</b>       | ionstats alignment                                                                                                                                                                                                                                                                                                        |
| <b>Analysis Parameters</b> | default                                                                                                                                                                                                                                                                                                                   |

## Chef Summary

### Chef Template Prep Information:

|                                         |                          |
|-----------------------------------------|--------------------------|
| <b>Chef Last Updated</b>                | July 14, 2020, 8:33 a.m. |
| <b>Chef Instrument Name</b>             | CHEF00839                |
| <b>Chef Operation Mode</b>              | Customer Mode            |
| <b>Sample Position</b>                  | 2                        |
| <b>Tip Rack Barcode</b>                 | 48B140103                |
| <b>Chip Type 1</b>                      | 520v1                    |
| <b>Chip Type 2</b>                      | 520v1                    |
| <b>Chip Expiration 1</b>                | None                     |
| <b>Chip Expiration 2</b>                | None                     |
| <b>Templating Kit Type</b>              | Ion 510                  |
| amp; Ion 520                            | amp; Ion 530 Kit-Chef    |
| <b>Chef Flexible Workflow</b>           |                          |
| <b>Reagent Expiration</b>               | 200331                   |
| <b>Reagent Lot Number</b>               | 2070211                  |
| <b>Reagent Part Number</b>              | A34018C                  |
| <b>Reagent Cartridge Serial Number</b>  | None                     |
| <b>Solution Lot Number</b>              | 2065570                  |
| <b>Solution Part Number</b>             | A27754C                  |
| <b>Templating Protocol Planned</b>      | Chef Protocol - 200 bp   |
| <b>Solution Cartridge Serial Number</b> | None                     |
| <b>Solution Expiration</b>              | 200331                   |
| <b>Templating Protocol Executed</b>     | Chef Protocol - 200 bp   |
| <b>Chef Script Version</b>              | 905                      |
| <b>Chef Package Version</b>             | IC.5.12.0                |
| <b>Start Time</b>                       | July 13, 2020, 1:28 p.m. |
| <b>Completion Time</b>                  | July 14, 2020, 8:33 a.m. |

## S5 Consumables Summary

|                     |           |
|---------------------|-----------|
| <b>Chip Type</b>    | 520v1     |
| <b>Chip Barcode</b> | DAGB02071 |

| Product Description       | Part Number | Lot Number | Exp. Date  | Remaining Uses |
|---------------------------|-------------|------------|------------|----------------|
| Ion S5 Cleaning Solution  | 100031096   | 2049959    | 2019/12/31 | 4              |
| Ion S5 Sequencing Reagent | INS1012841B | 2049947    | 2020/01/31 | 1              |
| Ion S5 Wash Solution      | 100031091B  | 2044840    | 2019/12/31 | 1              |

## Software Version

|                      |           |
|----------------------|-----------|
| <b>Torrent_Suite</b> | 5.12.0    |
| <b>host</b>          | tsvm      |
| <b>ion-analysis</b>  | 5.12.11-1 |
| <b>ion-dbreports</b> | 5.12.35-1 |
| <b>ion-gpu</b>       | 5.12.0-1  |
| <b>ion-pipeline</b>  | 5.12.11-1 |
| <b>ion-torrentpy</b> | 5.12.8-1  |
| <b>ion-torrentr</b>  | 5.12.10-1 |
| <b>S5 Script</b>     | 0.1.31    |
| <b>LiveView</b>      | 2514      |
| <b>DataCollect</b>   | 3738      |
| <b>OIA</b>           | 51206     |
| <b>OS</b>            | 35        |
| <b>Graphics</b>      | 134       |
| <b>Ion_Chef</b>      | IC.5.12.0 |
